# Supplementary material for: Metabolomic analysis of Trichophyton rubrum and Microsporum canis during keratin degradation
Source: PubMed Central journal article supplement (PMC7889620; doi:10.1038/s41598-021-83632-z), 2021-02-17
Supplement: 41598_2021_83632_MOESM1_ESM.pdf [file 41598_2021_83632_MOESM1_ESM.pdf]

## SUPPLEMENTARY MATERIALS

### Metabolomic analysis of *Trichophyton rubrum* and *Microsporum canis* during keratin degradation

Anita CIESIELSKA<sup>1</sup>, Anna KAWA<sup>1</sup>, Katarzyna KANAREK<sup>1</sup>, Adrian SOBÓŃ<sup>1</sup>, Rafał SZEWCZYK<sup>2</sup>

<sup>1</sup> Department of Molecular Microbiology, Faculty of Biology and Environmental Protection, University of Łódź, Poland

<sup>2</sup> LabExperts sp. z o.o., Gdańsk, Poland

#### Tables:

**Table S1** List of metabolites used in this study

**Table S2** LC-MS/MS parameters used for analysis of intracellular metabolites of *T. rubrum* and *M. canis*

**Table S3** MS/MS parameters and LC-MS/MS method performance for compound standards

**Table S1** List of metabolites used in this study

|           |                     |           |                          |           |                 |           |                                |           |                         |
|-----------|---------------------|-----------|--------------------------|-----------|-----------------|-----------|--------------------------------|-----------|-------------------------|
| <b>1</b>  | 5-aminovalerate     | <b>21</b> | FAD                      | <b>41</b> | Inosine         | <b>61</b> | L- $\alpha$ -Amino adipic acid | <b>81</b> | Tartrate                |
| <b>2</b>  | Acetyl-CoA          | <b>22</b> | Fumarate                 | <b>42</b> | Kynurenic acid  | <b>62</b> | Malate                         | <b>82</b> | Thiamine                |
| <b>3</b>  | Adenine             | <b>23</b> | G6P                      | <b>43</b> | L-Alanine       | <b>63</b> | Malonate                       | <b>83</b> | Tocopherol              |
| <b>4</b>  | Adenosine           | <b>24</b> | GABA                     | <b>44</b> | L-Arginine      | <b>64</b> | Melatonin                      | <b>84</b> | UDP                     |
| <b>5</b>  | Adipate             | <b>25</b> | GDP                      | <b>45</b> | L-Asparagine    | <b>65</b> | Myoinositol                    | <b>85</b> | UDP-glucose             |
| <b>6</b>  | ADP                 | <b>26</b> | Gluconate                | <b>46</b> | L-Aspartic acid | <b>66</b> | NAD                            | <b>86</b> | UMP                     |
| <b>7</b>  | AMP                 | <b>27</b> | Glucuronate              | <b>47</b> | L-Cysteine      | <b>67</b> | NADP                           | <b>87</b> | Uracil                  |
| <b>8</b>  | ATP                 | <b>28</b> | Glutathione oxidized     | <b>48</b> | L-Glutamic acid | <b>68</b> | Nicotinic acid                 | <b>88</b> | Uridine                 |
| <b>9</b>  | Betaine             | <b>29</b> | Glutathione reduced      | <b>49</b> | L-Glutamine     | <b>69</b> | Ornithine                      | <b>89</b> | UTP                     |
| <b>10</b> | Biotin              | <b>30</b> | GMP                      | <b>50</b> | L-Histidine     | <b>70</b> | Oxaloacetate                   | <b>90</b> | $\alpha$ -ketoglutarate |
| <b>11</b> | CDP                 | <b>31</b> | GTP                      | <b>51</b> | L-Leucine       | <b>71</b> | P5P                            |           |                         |
| <b>12</b> | Cis-aconitate       | <b>32</b> | Guanidine acetate        | <b>52</b> | L-Lysine        | <b>72</b> | PABA                           |           |                         |
| <b>13</b> | Citrate             | <b>33</b> | Guanosine                | <b>53</b> | L-Methionine    | <b>73</b> | Pantothenic acid               |           |                         |
| <b>14</b> | CMP                 | <b>34</b> | Homocysteine             | <b>54</b> | L-Phenylalanine | <b>74</b> | PEP                            |           |                         |
| <b>15</b> | CTP                 | <b>35</b> | Homocysteine thiolactone | <b>55</b> | L-Proline       | <b>75</b> | Pyridoxine                     |           |                         |
| <b>16</b> | Cyanocobalamin      | <b>36</b> | Homocysteine             | <b>56</b> | L-Serine        | <b>76</b> | Quinate                        |           |                         |
| <b>17</b> | Cystine             | <b>37</b> | Homoserine               | <b>57</b> | L-Threonine     | <b>77</b> | R5P                            |           |                         |
| <b>18</b> | Cytidine            | <b>38</b> | Hydroxy-L-proline        | <b>58</b> | L-Tryptophan    | <b>78</b> | Riboflavin                     |           |                         |
| <b>19</b> | Diaminopimelic acid | <b>39</b> | Hypoxanthine             | <b>59</b> | L-Tyrosine      | <b>79</b> | Succinic acid                  |           |                         |
| <b>20</b> | F16bP               | <b>40</b> | IMP                      | <b>60</b> | L-Valine        | <b>80</b> | Succinyl-CoA                   |           |                         |

**Table S2** LC-MS/MS parameters used for analysis of intracellular metabolites of *T. rubrum* and *M. canis*

| LC parameters                          |                                  |                                   |                               |                       |
|----------------------------------------|----------------------------------|-----------------------------------|-------------------------------|-----------------------|
|                                        | Column 1:<br>Eksigent 3C8-EP-120 | Column 2:<br>Eksigent C318-AQ-120 | Column 3:<br>Synergi Hydro-RP |                       |
| Injection volume                       | 2 µl                             | 2 µl                              | 10 µl                         |                       |
| Column temperature                     | 45°C                             | 40°C                              | 40°C                          |                       |
|                                        |                                  |                                   |                               |                       |
| MS/MS parameters                       |                                  |                                   |                               |                       |
| Polarity                               | positive                         | negative                          | negative                      |                       |
| CUR (Curtain gas)                      | 25                               | 25                                | 30                            |                       |
| CAD (Collision gas)                    | medium                           | medium                            | medium                        |                       |
| IS (Ion spray voltage)                 | 5000 V                           | -4500 V                           | -4500 V                       |                       |
| TEM (Source temperature)               | 400°C                            | 400°C                             | 500°C                         |                       |
| GS1 (Nebulizer gas)                    | 28                               | 28                                | 50                            |                       |
| GS2 (Drying gas)                       | 40                               | 40                                | 40                            |                       |
| ihe                                    | ON                               | ON                                | ON                            |                       |
| GRADIENT ANF FLOW OF THE MOBILE PHASES |                                  |                                   |                               |                       |
| step                                   | running time<br>[min]            | flow<br>[µl/min]                  | mobile phase<br>A [%]         | mobile phase<br>B [%] |
| Column 1                               |                                  |                                   |                               |                       |
| 1                                      | 0                                | 50                                | 98                            | 2                     |
| 2                                      | 0.2                              | 50                                | 98                            | 2                     |
| 3                                      | 2.2                              | 50                                | 5                             | 95                    |
| 4                                      | 3.4                              | 50                                | 5                             | 95                    |
| 5                                      | 3.5                              | 50                                | 98                            | 2                     |
| 6                                      | 4                                | 50                                | 98                            | 2                     |
| Column 2                               |                                  |                                   |                               |                       |
| 1                                      | 0                                | 50                                | 98                            | 2                     |
| 2                                      | 0.1                              | 50                                | 98                            | 2                     |
| 3                                      | 0.5                              | 50                                | 70                            | 30                    |
| 4                                      | 2.5                              | 50                                | 2                             | 98                    |
| 5                                      | 3.5                              | 50                                | 2                             | 98                    |
| 6                                      | 4                                | 50                                | 98                            | 2                     |
| Column 3                               |                                  |                                   |                               |                       |
| 1                                      | 0                                | 600                               | 100                           | 0                     |
| 2                                      | 0.2                              | 600                               | 100                           | 0                     |
| 3                                      | 5                                | 600                               | 5                             | 95                    |
| 4                                      | 7                                | 600                               | 5                             | 95                    |
| 5                                      | 7.1                              | 600                               | 100                           | 0                     |
| 6                                      | 15                               | 600                               | 100                           | 0                     |

**Table S3** MS/MS parameters and LC-MS/MS method performance for compound standards

| Metabolite Name                 | Q1    | Q3    | DP   | EP  | CE  | CXP | RT (min) | Linearity Range (ng/ml) <sup>1</sup> | R      | Column* |
|---------------------------------|-------|-------|------|-----|-----|-----|----------|--------------------------------------|--------|---------|
| L- $\alpha$ -Aminoadypic acid_1 | 162.0 | 98.1  | 51   | 10  | 25  | 8   | 0.42     | 0.5-100                              | 0.9996 | 1       |
| L- $\alpha$ -Aminoadypic acid_2 | 162.0 | 127.1 | 51   | 10  | 21  | 8   | 0.42     |                                      |        | 1       |
| L- $\alpha$ -Aminoadypic acid_3 | 162.0 | 144.1 | 51   | 10  | 21  | 6   | 0.42     |                                      |        | 1       |
| Adenosine_1                     | 268.0 | 136.0 | 66   | 10  | 35  | 10  | 0.55     | 0.25-100                             | 0.9960 | 1       |
| Adenosine_2                     | 268.0 | 131.2 | 66   | 10  | 21  | 6   | 0.55     |                                      |        | 1       |
| Adenosine_3                     | 268.0 | 119.1 | 66   | 10  | 35  | 4   | 0.55     |                                      |        | 1       |
| ADP_1                           | 426.0 | 78.8  | -95  | -10 | -23 | -11 | 0.54     | 10-1000                              | 0.9916 | 3       |
| ADP_2                           | 426.0 | 95.0  | -95  | -10 | -13 | -9  | 0.54     |                                      |        | 3       |
| ADP_3                           | 426.0 | 158.6 | -95  | -10 | -29 | -9  | 0.54     |                                      |        | 3       |
| L-Alanine_1                     | 90.1  | 44.0  | 31   | 10  | 19  | 6   | 0.39     | 25-250                               | 0.9974 | 1       |
| L-Alanine_2                     | 90.1  | 49.0  | 31   | 10  | 21  | 5   | 0.39     |                                      |        | 1       |
| L-Alanine_3                     | 90.1  | 45.0  | 31   | 10  | 31  | 6   | 0.39     |                                      |        | 1       |
| AMP_1                           | 345.9 | 78.8  | -100 | -10 | -21 | -13 | 0.64     | 5-1000                               | 0.9946 | 3       |
| AMP_2                           | 345.9 | 79.0  | -100 | -10 | -47 | -21 | 0.64     |                                      |        | 3       |
| AMP_3                           | 345.9 | 96.8  | -100 | -10 | -14 | -29 | 0.64     |                                      |        | 3       |
| L-Arginine_1                    | 175.1 | 70.2  | 46   | 10  | 13  | 8   | 0.34     | 1-100                                | 0.9988 | 1       |
| L-Arginine_2                    | 175.1 | 70.1  | 46   | 10  | 19  | 12  | 0.34     |                                      |        | 1       |
| L-Arginine_3                    | 175.1 | 60.1  | 46   | 10  | 25  | 6   | 0.34     |                                      |        | 1       |
| L-Asparagine_1                  | 133.1 | 87.0  | 46   | 10  | 15  | 8   | 0.39     | 2.5-100                              | 0.9951 | 1       |
| L-Asparagine_2                  | 133.1 | 85.0  | 46   | 10  | 39  | 6   | 0.39     |                                      |        | 1       |
| L-Asparagine_3                  | 133.1 | 74.1  | 46   | 10  | 15  | 4   | 0.39     |                                      |        | 1       |
| L-Aspartic acid_1               | 134.1 | 88.1  | 51   | 10  | 39  | 12  | 0.39     | 2.5-100                              | 0.9972 | 1       |
| L-Aspartic acid_2               | 134.1 | 81.1  | 51   | 10  | 13  | 8   | 0.39     |                                      |        | 1       |
| L-Aspartic acid_3               | 134.1 | 74.0  | 51   | 10  | 21  | 6   | 0.39     |                                      |        | 1       |

|                              |       |       |     |     |     |     |      |          |        |   |
|------------------------------|-------|-------|-----|-----|-----|-----|------|----------|--------|---|
| <b>ATP_1</b>                 | 506.0 | 158.7 | -15 | -10 | -15 | -5  | 0.51 | 25-1000  | 0.9928 | 3 |
| <b>ATP_2</b>                 | 506.0 | 102.1 | -15 | -10 | -27 | -10 | 0.51 |          |        | 3 |
| <b>ATP_3</b>                 | 506.0 | 78.8  | -15 | -10 | -17 | -21 | 0.51 |          |        | 3 |
| <b>Betaine_1</b>             | 118.0 | 58.0  | 76  | 10  | 41  | 16  | 0.41 | 1-50     | 0.9972 | 1 |
| <b>Betaine_2</b>             | 118.0 | 50.1  | 76  | 10  | 21  | 12  | 0.41 |          |        | 1 |
| <b>Betaine_3</b>             | 118.0 | 59.1  | 76  | 10  | 55  | 4   | 0.41 |          |        | 1 |
| <b>Cis-aconitate_1</b>       | 172.8 | 85.0  | -20 | -10 | -15 | -5  | 0.95 | 2.5-1000 | 0.9995 | 2 |
| <b>Cis-aconitate_2</b>       | 172.8 | 98.1  | -20 | -10 | -15 | -8  | 0.95 |          |        | 2 |
| <b>Cis-aconitate_3</b>       | 172.8 | 129.0 | -20 | -10 | -33 | -7  | 0.95 |          |        | 2 |
| <b>Citrate_1</b>             | 190.8 | 84.9  | -15 | -10 | -35 | -9  | 0.48 | 5-250    | 0.9889 | 3 |
| <b>Citrate_2</b>             | 190.8 | 75.2  | -15 | -10 | -19 | -4  | 0.48 |          |        | 3 |
| <b>Citrate_3</b>             | 190.8 | 86.9  | -15 | -10 | -23 | -7  | 0.48 |          |        | 3 |
| <b>CMP_1</b>                 | 321.9 | 78.8  | -70 | -10 | -17 | -1  | 0.51 | 10-1000  | 0.9965 | 3 |
| <b>CMP_2</b>                 | 321.9 | 100.2 | -70 | -10 | -26 | -4  | 0.51 |          |        | 3 |
| <b>CMP_3</b>                 | 321.9 | 96.9  | -70 | -10 | -19 | -7  | 0.51 |          |        | 3 |
| <b>L-Cysteine_1</b>          | 122.0 | 59.1  | 61  | 10  | 27  | 6   | 0.4  | 1-100    | 0.9974 | 1 |
| <b>L-Cysteine_2</b>          | 122.0 | 73.9  | 61  | 10  | 25  | 6   | 0.4  |          |        | 1 |
| <b>L-Cysteine_3</b>          | 122.0 | 76.1  | 61  | 10  | 21  | 6   | 0.4  |          |        | 1 |
| <b>Cytidine_1</b>            | 244.0 | 112.1 | 16  | 10  | 15  | 6   | 0.39 | 0.25-100 | 0.9963 | 1 |
| <b>Cytidine_2</b>            | 244.0 | 96.1  | 16  | 10  | 39  | 12  | 0.39 |          |        | 1 |
| <b>Cytidine_3</b>            | 244.0 | 94.9  | 16  | 10  | 27  | 12  | 0.39 |          |        | 1 |
| <b>Diaminopimelic acid_1</b> | 191.1 | 128.1 | 61  | 10  | 13  | 12  | 0.36 | 1-100    | 0.9998 | 1 |
| <b>Diaminopimelic acid_2</b> | 191.1 | 78.3  | 61  | 10  | 47  | 17  | 0.36 |          |        | 1 |
| <b>Diaminopimelic acid_3</b> | 191.1 | 82.0  | 61  | 10  | 21  | 6   | 0.36 |          |        | 1 |
| <b>F16bP_1</b>               | 338.9 | 78.8  | -15 | -10 | -15 | -5  | 0.47 | 5-1000   | 0.9916 | 3 |
| <b>F16bP_2</b>               | 338.9 | 96.5  | -15 | -10 | -19 | -19 | 0.47 |          |        | 3 |
| <b>F16bP_3</b>               | 338.9 | 96.8  | -15 | -10 | -39 | -7  | 0.47 |          |        | 3 |

|                               |       |       |      |     |     |     |      |          |        |   |
|-------------------------------|-------|-------|------|-----|-----|-----|------|----------|--------|---|
| <b>Fumarate_1</b>             | 114.9 | 70.9  | -35  | -10 | -31 | -5  | 0.88 | 1-100    | 0.9970 | 2 |
| <b>Fumarate_2</b>             | 114.9 | 96.8  | -35  | -10 | -37 | -17 | 0.88 |          |        | 2 |
| <b>Fumarate_3</b>             | 114.9 | 59.1  | -35  | -10 | -16 | -5  | 0.88 |          |        | 2 |
| <b>G6P_1</b>                  | 258.9 | 96.8  | -70  | -10 | -26 | -7  | 0.5  | 5-1000   | 0.9986 | 3 |
| <b>G6P_2</b>                  | 258.9 | 88.1  | -70  | -10 | -19 | -17 | 0.5  |          |        | 3 |
| <b>G6P_3</b>                  | 258.9 | 78.8  | -70  | -10 | -27 | -5  | 0.5  |          |        | 3 |
| <b>GABA_1</b>                 | 104.1 | 86.0  | 30   | 4   | 39  | 5   | 0.37 | 5-250    | 0.9977 | 1 |
| <b>GABA_2</b>                 | 104.1 | 158.7 | 30   | 4   | 15  | 9   | 0.37 |          |        | 1 |
| <b>GABA_3</b>                 | 104.1 | 69.0  | 30   | 4   | 13  | 6   | 0.37 |          |        | 1 |
| <b>GDP_1</b>                  | 441.9 | 78.9  | -90  | -10 | -27 | -7  | 0.54 | 10-1000  | 0.9944 | 3 |
| <b>GDP_2</b>                  | 441.9 | 59.1  | -90  | -10 | -43 | -5  | 0.54 |          |        | 3 |
| <b>GDP_3</b>                  | 441.9 | 158.8 | -90  | -10 | -15 | -9  | 0.54 |          |        | 3 |
| <b>Gluconate_1</b>            | 194.9 | 128.9 | -65  | -10 | -23 | -9  | 0.49 | 2.5-1000 | 0.9931 | 2 |
| <b>Gluconate_2</b>            | 194.9 | 86.9  | -65  | -10 | -27 | -9  | 0.49 |          |        | 2 |
| <b>Gluconate_3</b>            | 194.9 | 74.9  | -65  | -10 | -67 | -7  | 0.49 |          |        | 2 |
| <b>Glucuronate_1</b>          | 192.8 | 112.9 | -50  | -10 | -23 | -7  | 0.49 | 2.5-1000 | 0.9971 | 2 |
| <b>Glucuronate_2</b>          | 192.8 | 94.9  | -50  | -10 | -19 | -6  | 0.49 |          |        | 2 |
| <b>Glucuronate_3</b>          | 192.8 | 73.0  | -50  | -10 | -30 | -5  | 0.49 |          |        | 2 |
| <b>L-Glutamic acid_1</b>      | 148.0 | 84.0  | 46   | 10  | 45  | 6   | 0.4  | 1-100    | 0.9964 | 1 |
| <b>L-Glutamic acid_2</b>      | 148.0 | 78.8  | 46   | 10  | 15  | 7   | 0.4  |          |        | 1 |
| <b>L-Glutamic acid_3</b>      | 148.0 | 102.0 | 46   | 10  | 39  | 6   | 0.4  |          |        | 1 |
| <b>L-Glutamine_1</b>          | 147.1 | 84.1  | 36   | 10  | 29  | 4   | 0.4  | 1-100    | 0.9924 | 1 |
| <b>L-Glutamine_2</b>          | 147.1 | 101.1 | 36   | 10  | 24  | 2   | 0.4  |          |        | 1 |
| <b>L-Glutamine_3</b>          | 147.1 | 101.1 | 36   | 10  | 19  | 8   | 0.4  |          |        | 1 |
| <b>Glutathione oxidized_1</b> | 611.1 | 305.9 | -105 | -10 | -57 | -11 | 0.86 | 1-250    | 0.9894 | 2 |
| <b>Glutathione oxidized_2</b> | 611.1 | 78.7  | -105 | -10 | -17 | -12 | 0.86 |          |        | 2 |
| <b>Glutathione oxidized_3</b> | 611.1 | 271.8 | -105 | -10 | -39 | -9  | 0.86 |          |        | 2 |

|                              |       |       |     |     |     |     |      |          |        |   |
|------------------------------|-------|-------|-----|-----|-----|-----|------|----------|--------|---|
| <b>Glutathione reduced_1</b> | 305.9 | 142.8 | -60 | -10 | -17 | -11 | 0.75 | 2.5-1000 | 0.9966 | 2 |
| <b>Glutathione reduced_2</b> | 305.9 | 111.2 | -60 | -10 | -55 | -12 | 0.75 |          |        | 2 |
| <b>Glutathione reduced_3</b> | 305.9 | 271.9 | -60 | -10 | -15 | -13 | 0.75 |          |        | 2 |
| <b>GMP_1</b>                 | 361.9 | 78.8  | -15 | -10 | -25 | -11 | 0.55 | 5-1000   | 0.9947 | 3 |
| <b>GMP_2</b>                 | 361.9 | 96.0  | -15 | -10 | -92 | -10 | 0.55 |          |        | 3 |
| <b>GMP_3</b>                 | 361.9 | 96.9  | -15 | -10 | -50 | -7  | 0.55 |          |        | 3 |
| <b>GTP_1</b>                 | 521.9 | 78.9  | -80 | -10 | -44 | -13 | 0.48 | 25-1000  | 0.9973 | 3 |
| <b>GTP_2</b>                 | 521.9 | 57.1  | -80 | -10 | -44 | -12 | 0.48 |          |        | 3 |
| <b>GTP_3</b>                 | 521.9 | 423.9 | -80 | -10 | -29 | -13 | 0.48 |          |        | 3 |
| <b>Guanosine_1</b>           | 283.9 | 152.1 | 6   | 10  | 19  | 8   | 0.66 | 0.1-100  | 0.9998 | 1 |
| <b>Guanosine_2</b>           | 283.9 | 158.7 | 6   | 10  | 21  | 9   | 0.66 |          |        | 1 |
| <b>Guanosine_3</b>           | 283.9 | 135.0 | 6   | 10  | 39  | 8   | 0.66 |          |        | 1 |
| <b>L-Histidine_1</b>         | 156.0 | 110.0 | 61  | 10  | 27  | 14  | 0.33 | 2.5-100  | 0.9956 | 1 |
| <b>L-Histidine_2</b>         | 156.0 | 78.9  | 61  | 10  | 50  | 12  | 0.33 |          |        | 1 |
| <b>L-Histidine_3</b>         | 156.0 | 83.1  | 61  | 10  | 35  | 12  | 0.33 |          |        | 1 |
| <b>Hydroxy-L-proline_1</b>   | 132.0 | 86.0  | 1   | 10  | 19  | 8   | 0.4  | 2.5-100  | 0.9947 | 1 |
| <b>Hydroxy-L-proline_2</b>   | 132.0 | 73.0  | 1   | 10  | 25  | 4   | 0.4  |          |        | 1 |
| <b>Hydroxy-L-proline_3</b>   | 132.0 | 68.0  | 1   | 10  | 21  | 4   | 0.4  |          |        | 1 |
| <b>Hypoxanthine_1</b>        | 136.9 | 110.1 | 31  | 10  | 21  | 8   | 0.59 | 0.5-100  | 0.9992 | 1 |
| <b>Hypoxanthine_2</b>        | 136.9 | 100.8 | 31  | 10  | 35  | 5   | 0.59 |          |        | 1 |
| <b>Hypoxanthine_3</b>        | 136.9 | 94.0  | 31  | 10  | 21  | 6   | 0.59 |          |        | 1 |
| <b>IMP_1</b>                 | 347.1 | 347.0 | -10 | -10 | -35 | -13 | 0.58 | 25-1000  | 0.9847 | 3 |
| <b>IMP_2</b>                 | 347.1 | 57.1  | -10 | -10 | 23  | -11 | 0.58 |          |        | 3 |
| <b>IMP_3</b>                 | 347.1 | 78.9  | -10 | -10 | 13  | -7  | 0.58 |          |        | 3 |
| <b>Inosine_1</b>             | 268.9 | 137.0 | 101 | 10  | 29  | 12  | 0.62 | 0.25-100 | 0.9981 | 1 |
| <b>Inosine_2</b>             | 268.9 | 78.8  | 101 | 10  | 19  | 9   | 0.62 |          |        | 1 |
| <b>Inosine_3</b>             | 268.9 | 119.1 | 101 | 10  | 21  | 8   | 0.62 |          |        | 1 |

|                         |       |       |     |     |    |     |      |          |        |   |
|-------------------------|-------|-------|-----|-----|----|-----|------|----------|--------|---|
| <b>L-Leucine_1</b>      | 132.1 | 85.9  | 51  | 10  | 31 | 10  | 0.52 | 2.5-100  | 0.9962 | 1 |
| <b>L-Leucine_2</b>      | 132.1 | 158.7 | 51  | 10  | 21 | 10  | 0.52 |          |        | 1 |
| <b>L-Leucine_3</b>      | 132.1 | 69.3  | 51  | 10  | 47 | 8   | 0.52 |          |        | 1 |
| <b>Kynurenic acid_1</b> | 190.1 | 144.0 | 55  | 8   | 14 | 5   | 1.3  | 0.1-100  | 0.9992 | 1 |
| <b>Kynurenic acid_2</b> | 190.1 | 70.0  | 55  | 8   | 13 | 7   | 1.3  |          |        | 1 |
| <b>Kynurenic acid_3</b> | 190.1 | 89.0  | 55  | 8   | 19 | 7   | 1.3  |          |        | 1 |
| <b>L-Lysine_1</b>       | 147.2 | 84.2  | 36  | 10  | 25 | 6   | 0.33 | 2.5-100  | 0.9979 | 1 |
| <b>L-Lysine_2</b>       | 147.2 | 113.0 | 36  | 10  | 15 | 7   | 0.33 |          |        | 1 |
| <b>L-Lysine_3</b>       | 147.2 | 67.0  | 36  | 10  | 39 | 10  | 0.33 |          |        | 1 |
| <b>Malate_1</b>         | 132.9 | 114.9 | -15 | -10 | 15 | -9  | 0.65 | 5-1000   | 0.9972 | 2 |
| <b>Malate_2</b>         | 132.9 | 70.0  | -15 | -10 | 39 | -4  | 0.65 |          |        | 2 |
| <b>Malate_3</b>         | 132.9 | 70.9  | -15 | -10 | 13 | -5  | 0.65 |          |        | 2 |
| <b>L-Methionine_1</b>   | 150.1 | 104.1 | 51  | 10  | 21 | 8   | 0.47 | 1-100    | 0.9981 | 1 |
| <b>L-Methionine_2</b>   | 150.1 | 96.0  | 51  | 10  | 15 | 8   | 0.47 |          |        | 1 |
| <b>L-Methionine_3</b>   | 150.1 | 133.1 | 51  | 10  | 27 | 6   | 0.47 |          |        | 1 |
| <b>Myoinositol_1</b>    | 178.8 | 86.9  | -80 | -10 | 17 | -7  | 0.48 | 5-1000   | 0.9971 | 2 |
| <b>Myoinositol_2</b>    | 178.8 | 96.9  | -80 | -10 | 41 | -7  | 0.48 |          |        | 2 |
| <b>Myoinositol_3</b>    | 178.8 | 71.0  | -80 | -10 | 21 | -5  | 0.48 |          |        | 2 |
| <b>NAD_1</b>            | 662.0 | 540.0 | -75 | -10 | 55 | -7  | 1.39 | 2.5-1000 | 0.9968 | 3 |
| <b>NAD_2</b>            | 662.0 | 323.0 | -75 | -10 | 15 | -7  | 1.39 |          |        | 3 |
| <b>NAD_3</b>            | 662.0 | 78.9  | -75 | -10 | 15 | -7  | 1.39 |          |        | 3 |
| <b>Nicotinic acid_1</b> | 124.0 | 79.9  | 26  | 10  | 33 | 8   | 0.49 | 1-100    | 0.9990 | 1 |
| <b>Nicotinic acid_2</b> | 124.0 | 78.9  | 26  | 10  | 35 | 11  | 0.49 |          |        | 1 |
| <b>Nicotinic acid_3</b> | 124.0 | 53.0  | 26  | 10  | 19 | 14  | 0.49 |          |        | 1 |
| <b>Oxaloacetate_1</b>   | 131.0 | 86.9  | -55 | -10 | 23 | -5  | 0.5  | 50-500   | 0.9966 | 3 |
| <b>Oxaloacetate_2</b>   | 131.0 | 91.0  | -55 | -10 | 17 | -10 | 0.5  |          |        | 3 |
| <b>Oxaloacetate_3</b>   | 131.0 | 112.9 | -55 | -10 | 26 | -7  | 0.5  |          |        | 3 |



|                           |       |       |     |     |     |     |      |          |        |   |
|---------------------------|-------|-------|-----|-----|-----|-----|------|----------|--------|---|
| <b>PABA_1</b>             | 138.0 | 77.0  | 56  | 10  | 19  | 10  | 1.16 | 0.1-100  | 0.9999 | 1 |
| <b>PABA_2</b>             | 138.0 | 137.0 | 56  | 10  | 27  | 6   | 1.16 |          |        | 1 |
| <b>PABA_3</b>             | 138.0 | 94.0  | 56  | 10  | 19  | 8   | 1.16 |          |        | 1 |
| <b>Pantothenic acid_1</b> | 217.9 | 87.8  | -70 | -10 | -18 | -7  | 1    | 0.5-100  | 0.9980 | 2 |
| <b>Pantothenic acid_2</b> | 217.9 | 165.0 | -70 | -10 | -27 | -7  | 1    |          |        | 2 |
| <b>Pantothenic acid_3</b> | 217.9 | 146.0 | -70 | -10 | -22 | -7  | 1    |          |        | 2 |
| <b>PEP_1</b>              | 166.8 | 78.8  | -40 | -10 | -44 | -7  | 0.48 | 2.5-1000 | 0.9992 | 3 |
| <b>PEP_2</b>              | 166.8 | 122.1 | -40 | -10 | -52 | -9  | 0.48 |          |        | 3 |
| <b>PEP_3</b>              | 166.8 | 62.8  | -40 | -10 | -90 | -3  | 0.48 |          |        | 3 |
| <b>L-Phenylalanine_1</b>  | 166.1 | 120.1 | 26  | 10  | 17  | 10  | 0.64 | 1-100    | 0.9988 | 1 |
| <b>L-Phenylalanine_2</b>  | 166.1 | 143.9 | 26  | 10  | 22  | 11  | 0.64 |          |        | 1 |
| <b>L-Phenylalanine_3</b>  | 166.1 | 103.0 | 26  | 10  | 39  | 10  | 0.64 |          |        | 1 |
| <b>Piridoxine_1</b>       | 170.0 | 152.1 | 36  | 10  | 19  | 6   | 0.43 | 0.5-25   | 0.9963 | 1 |
| <b>Piridoxine_2</b>       | 170.0 | 78.9  | 36  | 10  | 45  | 8   | 0.43 |          |        | 1 |
| <b>Piridoxine_3</b>       | 170.0 | 134.0 | 36  | 10  | 27  | 4   | 0.43 |          |        | 1 |
| <b>L-Proline_1</b>        | 116.0 | 70.1  | 36  | 10  | 19  | 8   | 0.42 | 1-100    | 0.9981 | 1 |
| <b>L-Proline_2</b>        | 116.0 | 86.9  | 36  | 10  | 53  | 5   | 0.42 |          |        | 1 |
| <b>L-Proline_3</b>        | 116.0 | 68.0  | 36  | 10  | 39  | 4   | 0.42 |          |        | 1 |
| <b>R5P_1</b>              | 228.9 | 96.9  | -65 | -10 | -18 | -5  | 0.5  | 2.5-1000 | 0.9944 | 3 |
| <b>R5P_2</b>              | 228.9 | 86.9  | -65 | -10 | -22 | -9  | 0.5  |          |        | 3 |
| <b>R5P_3</b>              | 228.9 | 78.9  | -65 | -10 | -52 | -11 | 0.5  |          |        | 3 |
| <b>Riboflavin_1</b>       | 377.1 | 243.0 | 135 | 10  | 44  | 11  | 1.15 | 0.25-250 | 0.9997 | 1 |
| <b>Riboflavin_2</b>       | 377.1 | 382.4 | 135 | 10  | 22  | 10  | 1.15 |          |        | 1 |
| <b>Riboflavin_3</b>       | 377.1 | 172.1 | 135 | 10  | 44  | 11  | 1.15 |          |        | 1 |
| <b>L-Serine_1</b>         | 106.0 | 60.1  | 1   | 10  | 15  | 4   | 0.39 | 5-100    | 0.9968 | 1 |
| <b>L-Serine_2</b>         | 106.0 | 71.0  | 1   | 10  | 67  | 7   | 0.39 |          |        | 1 |
| <b>L-Serine_3</b>         | 106.0 | 42.0  | 1   | 10  | 33  | 10  | 0.39 |          |        | 1 |

|                 |       |       |     |     |      |     |      |          |        |   |
|-----------------|-------|-------|-----|-----|------|-----|------|----------|--------|---|
| Succinic acid_1 | 116.8 | 73.0  | -35 | -10 | -16  | -5  | 0.89 | 5-500    | 0.9927 | 2 |
| Succinic acid_2 | 116.8 | 78.8  | -35 | -10 | -43  | -7  | 0.89 |          |        | 2 |
| Succinic acid_3 | 116.8 | 98.9  | -35 | -10 | -14  | -9  | 0.89 |          |        | 2 |
| L-Threonine_1   | 265.0 | 122.1 | 36  | 10  | 25   | 4   | 0.32 | 0.25-100 | 0.9979 | 1 |
| L-Threonine_2   | 265.0 | 143.9 | 36  | 10  | 21   | 12  | 0.32 |          |        | 1 |
| L-Threonine_3   | 265.0 | 57.1  | 36  | 10  | 25   | 6   | 0.32 |          |        | 1 |
| L-Tryptophan_1  | 205.1 | 188.0 | 41  | 10  | 15   | 8   | 0.98 | 1-100    | 0.9999 | 1 |
| L-Tryptophan_2  | 205.1 | 86.9  | 41  | 10  | 34   | 9   | 0.98 |          |        | 1 |
| L-Tryptophan_3  | 205.1 | 146.1 | 41  | 10  | 25   | 10  | 0.98 |          |        | 1 |
| L-Tyrosine_1    | 182.0 | 165.0 | 36  | 10  | 15   | 6   | 0.57 | 0.5-100  | 0.9993 | 1 |
| L-Tyrosine_2    | 182.0 | 112.1 | 36  | 10  | 76   | 7   | 0.57 |          |        | 1 |
| L-Tyrosine_3    | 182.0 | 91.0  | 36  | 10  | 39   | 6   | 0.57 |          |        | 1 |
| UDP_1           | 403.0 | 78.7  | -60 | -10 | -100 | -5  | 0.51 | 10-1000  | 0.9981 | 3 |
| UDP_2           | 403.0 | 128.1 | -60 | -10 | -67  | -9  | 0.51 |          |        | 3 |
| UDP_3           | 403.0 | 158.7 | -60 | -10 | -32  | -5  | 0.51 |          |        | 3 |
| UDP-glucose_1   | 565.0 | 323.0 | -90 | -10 | -32  | -11 | 0.52 | 2.5-250  | 0.9974 | 3 |
| UDP-glucose_2   | 565.0 | 437.0 | -90 | -10 | -11  | -13 | 0.52 |          |        | 3 |
| UDP-glucose_3   | 565.0 | 78.9  | -90 | -10 | -112 | -7  | 0.52 |          |        | 3 |
| UMP_1           | 322.8 | 78.9  | -90 | -10 | -100 | -7  | 0.51 | 10-1000  | 0.9973 | 3 |
| UMP_2           | 322.8 | 96.8  | -90 | -10 | -98  | -5  | 0.51 |          |        | 3 |
| UMP_3           | 322.8 | 96.9  | -90 | -10 | -26  | -7  | 0.51 |          |        | 3 |
| Uracil_1        | 113.0 | 96.0  | 41  | 10  | 23   | 6   | 0.55 | 5-100    | 0.9990 | 1 |
| Uracil_2        | 113.0 | 128.9 | 41  | 10  | 43   | 11  | 0.55 |          |        | 1 |
| Uracil_3        | 113.0 | 70.0  | 41  | 10  | 19   | 16  | 0.55 |          |        | 1 |
| Uridine_1       | 244.9 | 113.0 | 31  | 10  | 30   | 10  | 0.56 | 0.5-100  | 0.9988 | 1 |
| Uridine_2       | 244.9 | 70.9  | 31  | 10  | 13   | 9   | 0.56 |          |        | 1 |
| Uridine_3       | 244.9 | 70.0  | 31  | 10  | 45   | 6   | 0.56 |          |        | 1 |

|                                            |       |       |     |     |      |     |      |         |        |   |
|--------------------------------------------|-------|-------|-----|-----|------|-----|------|---------|--------|---|
| <b>UTP_1</b>                               | 482.9 | 158.7 | -85 | -10 | -34  | -5  | 0.5  | 10-1000 | 0.9954 | 3 |
| <b>UTP_2</b>                               | 482.9 | 96.8  | -85 | -10 | -55  | -8  | 0.5  |         |        | 3 |
| <b>UTP_3</b>                               | 482.9 | 78.8  | -85 | -10 | -102 | -5  | 0.5  |         |        | 3 |
| <b>L-Valine_1</b>                          | 118.1 | 57.1  | 66  | 10  | 39   | 14  | 0.44 | 5-250   | 0.9946 | 1 |
| <b>L-Valine_2</b>                          | 118.1 | 57.1  | 66  | 10  | 43   | 9   | 0.44 |         |        | 1 |
| <b>L-Valine_3</b>                          | 118.1 | 78.9  | 66  | 10  | 89   | 11  | 0.44 |         |        | 1 |
| <b><math>\alpha</math>-ketoglutarate_1</b> | 144.9 | 100.8 | -5  | -10 | -12  | -3  | 0.49 | 10-250  | 0.9973 | 3 |
| <b><math>\alpha</math>-ketoglutarate_2</b> | 144.9 | 99.3  | -5  | -10 | -17  | -11 | 0.49 |         |        | 3 |
| <b><math>\alpha</math>-ketoglutarate_3</b> | 144.9 | 73.0  | -5  | -10 | -18  | -7  | 0.49 |         |        | 3 |

<sup>1</sup> First MRM transition was chosen for quantitative analysis, second was confirmatory transition.

\* Column 1: Eksigent 3C8-EP-120 (0.5 × 150 mm, 3  $\mu$ m, Eksigent);

Column 2: Eksigent 3C18-AQ-120 (0.5 × 150 mm, 3  $\mu$ m, Eksigent);

Column 3: Synergi Hydro-RP column (2 × 150 mm, 4  $\mu$ m, Phenomenex)
